# Supplementary material
Source: PubMed Central journal article supplement (PMC2268795)

Frequency

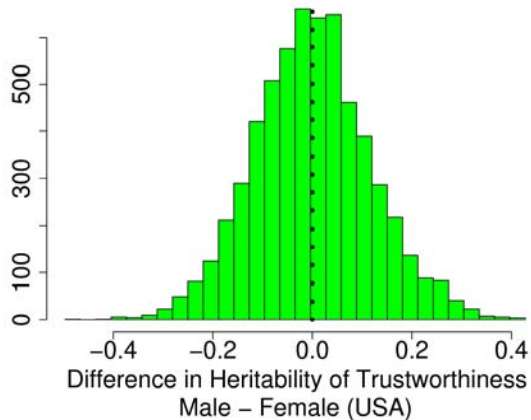

Frequency

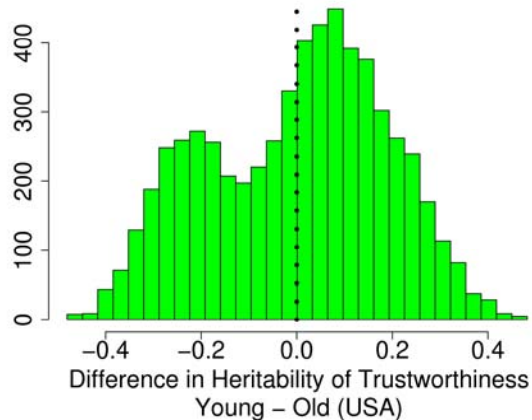

Frequency

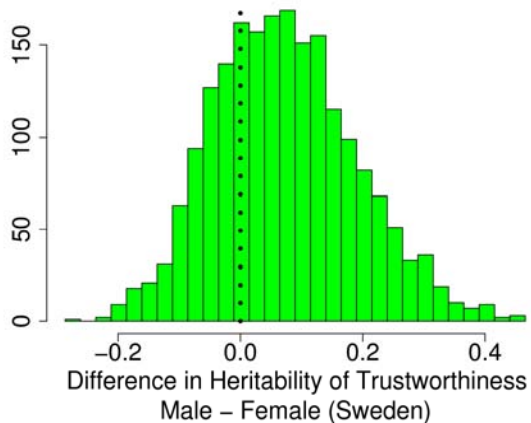

Frequency

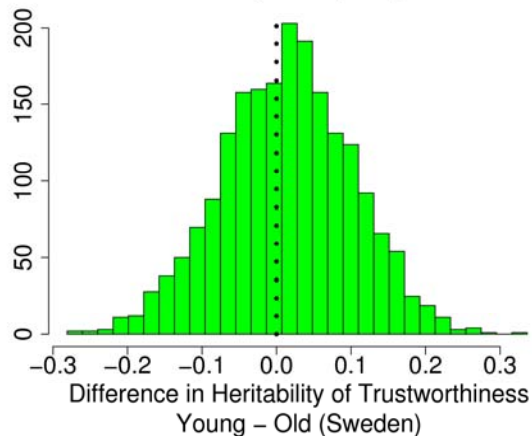

Supplement: pnas_0710069105_2.pdf [file pnas_0710069105_2.pdf]
